# Supplementary material
Source: PubMed Central journal article supplement (PMC6068794)
Supplement: Supplemental_material3.pdf [file Supplemental_material3.pdf]

## Supplementary material

### Patients and methods

#### *Laboratory tests*

In sub-study I, laboratory tests were performed using a fasting blood sample obtained at the day of study inclusion. In addition to hepatitis A/B/C/E serology, we performed serologic tests for autoimmune hepatitis and primary biliary as well as primary sclerosing cholangitis. Moreover, patients were evaluated for other metabolic liver diseases (hemochromatosis [serum iron, transferrin, and ferritin levels, as well as transferrin saturation] and Wilson's disease [serum copper and ceruloplasmin levels]).

#### *Short form (36) health survey and alcohol use disorders identification test*

Health-related quality of life was assessed using the German translation of the SF-36v2 survey (Optum, Eden Prairie, MN, USA). This questionnaire has extensively been used in patients with pulmonary manifestation of A1AD, as well as chronic liver disease populations.<sup>1-5</sup> The SF-36 consists of 36 questions measuring eight health domains, providing psychometrically-based physical component summary (PCS) and mental component summary (MCS) scores. Norm-based scaling in reference to a general population with an average value of 50 points was applied. Values between 45 and 55 points denote normal HRQOL, while scores <45 and >55 points indicate worse and better HRQOL, respectively.

### *Hepatic venous pressure gradient measurement*

The Vienna Hepatic Hemodynamic Lab at the Medical University of Vienna performed the hepatic venous pressure gradient (HVPG) measurements in patients included in sub-study II according to a standardized operating procedure<sup>6</sup>. HVPG measurements were performed in the absence of non-selective beta blockers and nitrates. Clinically significant portal hypertension (CSPH) was defined by HVPG values  $\geq 10$  mmHg.<sup>7, 8</sup>

### *SERPINA1 genotyping*

Subjects included in sub-study I were genotyped by a reference laboratory. In patients with CSPH and liver donors (sub-study II), *SERPINA1 rs28929474* genotyping was performed using using a StepOnePlus Real-Time PCR System and a TaqMan SNP Genotyping Assay (Applied Biosystems, USA).

### *Statistical analyses*

Statistical analyses were performed using IBM SPSS Statistics 24 (IBM, Armonk, NY, USA) and GraphPad Prism 7 (GraphPad Software, La Jolla, CA, USA).

Continuous variables were reported as mean  $\pm$  standard error of the mean or median (interquartile range), while categorical variables were reported as number of subjects with (proportion of subjects with) the certain characteristic.

Student's t test was used for group comparisons of continuous variables when applicable. Otherwise, Mann-Whitney U test was applied. Group comparisons of categorical variables were performed using Chi squared or Fisher's Exact test. Spearman's rank correlation analysis was used to investigate correlates of liver stiffness and CAP.

A *P* value  $\leq 0.05$  was considered statistically significant.

## Results

### Sub-study II

#### *Patient characteristics*

The median age of the subjects enrolled in sub-study II was 54.2(27.5) years. The mean body mass index (BMI) was 25.1 0.6 kg x m<sup>-2</sup>. About one third (38.1%[16/42]) of the study participants were overweight (25-29.9 kg x m<sup>-2</sup>), while 11.9%(5/42) were obese (≥30 kg x m<sup>-2</sup>). Among patients treated by pulmonologists (Pi\*ZZ/SZ), the median forced expiratory volume in 1 second (FEV<sub>1</sub>) was 44(40) %. The proportion of patients on α1-antitrypsin augmentation therapy was (61.2%[19/31]), while 71%(22/31) and 25.8%(8/31) received bronchodilators and long-term oxygen treatment, respectively. Four patients (12.9%[4/31]) had a history of lung transplantation. Importantly, none of the subjects enrolled in sub-study I had a history of congestive heart failure or showed evidence of extrahepatic cholestasis, which could have interfered with liver stiffness measurements.<sup>9</sup> Additional patient characteristics are shown in Table 1.

#### *Hepatitis A/B vaccination and hepatitis E seroprevalence*

Only 26.2%(11/42) of subjects included in sub-study II were vaccinated against hepatitis A/B. Even in the subgroup of patients on α1-antitrypsin augmentation therapy, the vaccination rate was only 45%(9/20). In this subgroup of patients, the rate of hepatitis E antibody positivity was 25%(5/20).

#### *Health-related quality of life*

In the overall cohort, we observed a PCS of  $38.9 \pm 2$  points, indicating impaired physical health (Table 1). In contrast, MCS suggests better-than-average mental health (55.5[8.6] points). As expected, health-related quality of life was unaffected by the presence of liver fibrosis  $\geq$ F2.

## References

1. Dowson LJ, Newall C, Guest PJ, Hill SL and Stockley RA. Exercise capacity predicts health status in alpha(1)-antitrypsin deficiency. *Am J Respir Crit Care Med.* 2001; 163: 936-41.
2. Dowson LJ, Guest PJ and Stockley RA. The relationship of chronic sputum expectoration to physiologic, radiologic, and health status characteristics in alpha(1)-antitrypsin deficiency (PiZ). *Chest.* 2002; 122: 1247-55.
3. Campos MA, Alazemi S, Zhang G, Wanner A and Sandhaus RA. Effects of a disease management program in individuals with alpha-1 antitrypsin deficiency. *COPD.* 2009; 6: 31-40.
4. Mandorfer M, Payer BA, Scheiner B, et al. Health-related quality of life and severity of fatigue in HIV/HCV co-infected patients before, during, and after antiviral therapy with pegylated interferon plus ribavirin. *Liver Int.* 2014; 34: 69-77.
5. Scheiner B, Schwabl P, Steiner S, et al. Interferon-free regimens improve health-related quality of life and fatigue in HIV/HCV-coinfected patients with advanced liver disease: A retrospective study. *Medicine.* 2016; 95: e4061.
6. Ferlitsch A, Bota S, Paternostro R, et al. Evaluation of a new balloon occlusion catheter specifically designed for measurement of hepatic venous pressure gradient. *Liver Int.* 2015; 35: 2115-20.
7. Reiberger T, Püspök A, Schoder M, et al. Austrian consensus guidelines on the management and treatment of portal hypertension (Billroth III). *Wiener klinische Wochenschrift.* 2017; 129: 135-158.

8. de Franchis R and Baveno VIF. Expanding consensus in portal hypertension: Report of the Baveno VI Consensus Workshop: Stratifying risk and individualizing care for portal hypertension. *J Hepatol.* 2015; 63: 743-52.
9. European Association for Study of L and Asociacion Latinoamericana para el Estudio del H. EASL-ALEH Clinical Practice Guidelines: Non-invasive tests for evaluation of liver disease severity and prognosis. *J Hepatol.* 2015; 63: 237-64.

**Supplementary table 1**

|                                                                | Liver stiffness,<br>n=42 |                | CAP,<br>n=41 |                |
|----------------------------------------------------------------|--------------------------|----------------|--------------|----------------|
|                                                                | $\rho$                   | <i>P</i> value | $\rho$       | <i>P</i> value |
| Age, years                                                     | 0.089                    | 0.573          | 0.339        | 0.03           |
| BMI, kg x m <sup>-2</sup>                                      | 0.276                    | 0.077          | 0.449        | 0.003          |
| Liver stiffness, kPa                                           | -                        | -              | 0.304        | 0.053          |
| CAP, dB x m <sup>-1</sup>                                      | 0.304                    | 0.053          | -            | -              |
| Platelet count, G x L <sup>-1</sup>                            | -0.38                    | 0.013          | -0.157       | 0.326          |
| Bilirubin, mg x dL <sup>-1</sup>                               | -0.019                   | 0.907          | -0.231       | 0.147          |
| Albumin, g x L <sup>-1</sup>                                   | 0.069                    | 0.663          | -0.299       | 0.057          |
| Prothrombin time, %                                            | -0.281                   | 0.071          | -0.029       | 0.856          |
| AP, U x L <sup>-1</sup>                                        | 0.102                    | 0.518          | -0.018       | 0.912          |
| AST, U x L <sup>-1</sup>                                       | 0.175                    | 0.267          | 0.102        | 0.528          |
| ALT, U x L <sup>-1</sup>                                       | 0.144                    | 0.363          | 0.126        | 0.432          |
| GGT, U x L <sup>-1</sup>                                       | 0.266                    | 0.089          | 0.166        | 0.299          |
| Triglycerides, mg x dL <sup>-1</sup>                           | 0.201                    | 0.201          | 0.282        | 0.074          |
| Cholesterol, mg x dL <sup>-1</sup>                             | 0.024                    | 0.878          | 0.18         | 0.259          |
| LDL, mg x dL <sup>-1</sup>                                     | 0.081                    | 0.611          | 0.001        | 0.997          |
| HDL, mg x dL <sup>-1</sup>                                     | -0.324                   | 0.036          | 0.029        | 0.859          |
| HbA1c, %                                                       | -0.08                    | 0.625          | 0.394        | 0.013          |
| HOMA-IR, mg x $\mu$ U x dL <sup>-1</sup><br>x mL <sup>-1</sup> | 0.231                    | 0.141          | 0.474        | 0.002          |
| hsCRP, mg x L <sup>-1</sup>                                    | 0.081                    | 0.618          | 0.418        | 0.008          |
| vWF antigen, %                                                 | 0.032                    | 0.842          | 0.451        | 0.003          |
| $\alpha$ 1-antitrypsin, mg x dL <sup>-1</sup>                  | 0.158                    | 0.317          | -0.081       | 0.616          |
| SF-36 PCS, points                                              | -0.245                   | 0.144          | -0.366       | 0.028          |
| SF-36 MCS, points                                              | 0.175                    | 0.3            | 0.098        | 0.568          |

|               |       |       |        |       |
|---------------|-------|-------|--------|-------|
| AUDIT, points | 0.047 | 0.769 | -0.249 | 0.117 |
|---------------|-------|-------|--------|-------|

---

**Supplementary table 1.** Correlation between liver stiffness/controlled attenuation parameter (CAP) and epidemiologic and anthropometric characteristics, laboratory parameters, health-related quality of life, and alcohol use.

**Abbreviations:** BMI, body mass index; CAP, controlled attenuation parameter; AP, alkaline phosphatase; AST, aspartate transaminase; ALT, alanine transaminase; GGT, gamma-glutamyltransferase; LDL, low-density lipoprotein; HDL, high-density lipoprotein; HbA1c, glycated hemoglobin; HOMA-IR, homeostatic model assessment of insulin resistance; hsCRP, high-sensitivity C-reactive protein; vWF, von Willebrand factor; SF-36, short form (36) health survey; AUDIT, alcohol use disorders identification test
